# Supplementary material
Source: Springer Nature journal article supplement (https://www.springermedizin.de/resource/supplementary/12882_2011_339_MOESM5_ESM.pdf/9453600)

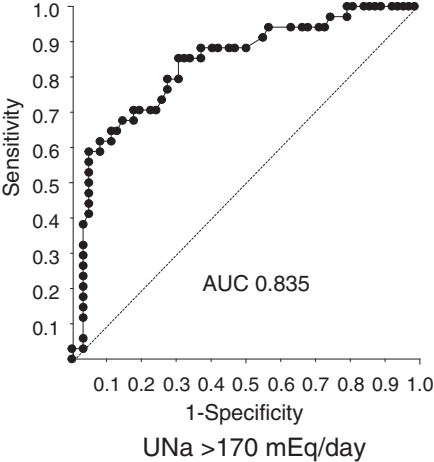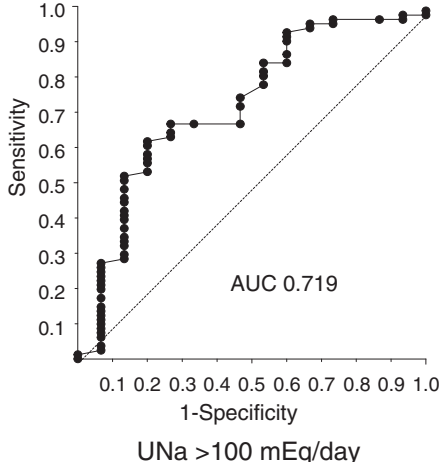

Supplement: MOESM5 [file 9453600]
